**Table S1.** Primer sequences for gene regions detected and sequenced for Israeli Acute Paralysis virus (IAPV), Deformed Wing virus (DWV), Kashmir Bee virus (KBV), Blackened Queen Cell virus (BQCV), and Sacbrood virus (SBV).

| <b>Virus</b> | <b>Primer Name</b> | <b>Gene</b>  | <b>Location (nt)</b> | <b>Product (bp)</b> | <b>Accession No.</b> | <b>Forward (5'-3') Primer</b> | <b>Reverse (5'-3') Primer</b> | <b>Created by</b> | <b>Purpose or use in this paper</b>       |
|--------------|--------------------|--------------|----------------------|---------------------|----------------------|-------------------------------|-------------------------------|-------------------|-------------------------------------------|
| IAPV         | IAPV Capsid1       | Capsid       | 7776-8616            | 840                 | NC009025             | GGTCCAAACCTCGAAATCAA          | TTGGTCCGGATGTTAATGGT          | This paper        | Diagnostic assay or phylogenetic analysis |
| DWV          | DWV VP1a           | Capsid       | 2624-3047            | 424                 | NC004830             | CTCGTCATTTTGTCCCGACT          | TGCAAAGATGCTGTCAAACC          | This paper        | Diagnostic assay or phylogenetic analysis |
| DWV          | DWV VP1b           | Capsid       | 2948-3475            | 528                 | NC004830             | GGCGTGGTTCATTAGAATATAGG       | AAGCAGATCCCCACCTAAAAA         | This paper        | Phylogenetic analysis                     |
| DWV          | DWV VP1c           | Capsid       | 3415-3860            | 446                 | NC004830             | GCTGGAGTGTGGCATAGCTT          | CGAGACTCCTCTCCTTCTGG          | This paper        | Phylogenetic analysis                     |
| KBV          | KBV Capsid1        | Capsid       | 7941-8565            | 625                 | NC004807             | TGTTTGTGGCAATCCAGCTA          | TACGTCTTCTGCCATTTC            | This paper        | Diagnostic assay                          |
| BQCV         | BQCV 3'UTR         | Capsid/3'UTR | 7850-8550            | 700                 | NC003784             | TGGTCAGTCCCACTACCTTAAAC       | GCAACAAGAAGAAACGTAAACCAC      | [56]              | Diagnostic assay or phylogenetic analysis |
| SBV          | SBV VP1b           | Capsid       | 1655-2347            | 693                 | AF092924             | GCACGTTTAATTGGGGATCA          | CAGGTTGTCCTTACCTCCA           | This paper        | Diagnostic assay or phylogenetic analysis |
